# Supplementary material for: A vitamin cross-feeding mechanism mediates microbial niche adaptation on leaves
Source: Research Square preprint supplement (doi:10.21203/rs.3.rs-8234549/v1), 2026-01-08
Supplement: Supplementary file 1 [file Supplementary tables.xlsx]

## Sheet: table S1_Interactors
table S1. List of interacting OTUs of A. laibachii OTU from oomycete amplicons. Yellow color highlighted the genera that we have tested in the gnotobiotic experiment.
OTU_ID	Correlation score	Interaction type	pvalue	Kingdom	Genus
d96989fc36f17efec684123db1413110_bacteria	-0.205	Negative	0.004	Bacteria	Acidothermus
727a0019cd714f3c1254b93a94a9aabe_bacteria	-0.33	Negative	0.001	Bacteria	Amnibacterium
be23ac7180eac196be3e0514333d4301_bacteria	0.2011	Positive	0.019	Bacteria	Arenimonas
c4f812a2f2095a7e9a8060a1c5a98588_bacteria	0.1984	Positive	0.006	Bacteria	Arthrobacter
59f72dd6eaf2a9d277540becada0fb4c_bacteria	-0.1793	Negative	0.035	Bacteria	Bradyrhizobium
334a4708e1cedc4f04c44f0f47d2f29e_bacteria	-0.1902	Negative	0.023	Bacteria	Brevundimonas
d54ca076b9cf97723c4a8be8304c05e1_bacteria	-0.1803	Negative	0.013	Bacteria	Bryobacter
410eb181ab34fd951e2c531978b6faae_bacteria	0.2088	Positive	0.013	Bacteria	Cellvibrio
eec64780e6b621c93e5dc66bc10bed22_bacteria	-0.1984	Negative	0.013	Bacteria	Conexibacter
e8685172a54f1bfdffcce32273cb42f3_bacteria	-0.2217	Negative	0.007	Bacteria	Deinococcus
0a78918b318c9a666440b19941b2c94e_bacteria	0.2274	Positive	0.004	Bacteria	Duganella
12ce93ddd82908b0631426465fc4feff_bacteria	0.1687	Positive	0.044	Bacteria	Ilumatobacter
53d2340d5f7b4ef070da39397346b625_bacteria	-0.3045	Negative	0.001	Bacteria	Jatrophihabitans
ed6fcc3e0305e5fa551e1c67f33c1226_bacteria	-0.201	Negative	0.015	Bacteria	Kineosporia
871638cacece191a60d3f3fe9407c592_bacteria	0.1821	Positive	0.039	Bacteria	Klenkia
3ade6fe2d83cee514a202e7c8237dc14_bacteria	-0.248	Negative	0.001	Bacteria	Limnobacter
eb434ae05f7cf08515f5a9eedc7b77b9_bacteria	-0.2129	Negative	0.006	Bacteria	Methylorosula
8592bfbdc869e66e390f54ea07547ee2_bacteria	0.1623	Positive	0.045	Bacteria	Microbacterium
623e85cafaa7d77615b1f2c4a51a4e58_bacteria	-0.1769	Negative	0.009	Bacteria	Modestobacter
cfad561ce0a5f1aaddf0970d204a1e35_bacteria	-0.3407	Negative	0.001	Bacteria	Mycobacterium
6025a8d68dfe9ed561f3501b70ef5274_bacteria	-0.1908	Negative	0.032	Bacteria	Nakamurella
f26613069d47c75ba35ac6e391427f1d_bacteria	-0.1814	Negative	0.031	Bacteria	Nocardia
d0c26a44a7a8b6ee4ba716861fc44da2_bacteria	-0.172	Negative	0.034	Bacteria	Nocardioides
41701e0adab2a616c9ee9b352beca639_bacteria	-0.1682	Negative	0.029	Bacteria	Novosphingobium
486eef6f6e7d9269c40a644d2d6832d6_bacteria	-0.1541	Negative	0.025	Bacteria	Oxalicibacterium
c256985cf7f385fa0e158aac9692f64d_bacteria	0.179	Positive	0.023	Bacteria	Pigmentiphaga
a50637e49cb2e7062c4fe563e8804b5c_bacteria	0.1856	Positive	0.023	Bacteria	Polaromonas
c2ff2968fc5eb368695f90ee12c20b86_bacteria	0.1933	Positive	0.022	Bacteria	Pseudomonas
ab16c4e2e7a7ffc9a83c0ce1a1036214_bacteria	0.2493	Positive	0.002	Bacteria	Quadrisphaera
162bf54549080b290d1ec8b0e6afbc1b_bacteria	-0.3238	Negative	0.001	Bacteria	Rhizobacter
9f9db7a86cad05f5ce499615c163e8a9_bacteria	-0.1734	Negative	0.01	Bacteria	Rhodovastum
64d446be25ef73bf9cdd2d1c75b28328_bacteria	-0.203	Negative	0.012	Bacteria	Solirubrobacter
6b8c4022aecbbb83eeb5c79d9997ba1f_bacteria	-0.1893	Negative	0.042	Bacteria	Sphingomonas
db38587cad3ac0e5373ae4ad85d4d1f6_bacteria	0.1504	Positive	0.032	Bacteria	Sphingopyxis
427faf4c79ebf8288c8dc1c34cb6273e_bacteria	0.204	Positive	0.011	Bacteria	Sphingorhabdus
c4e15ee4c6a6debb8ef308d21e737e8e_bacteria	-0.3188	Negative	0.001	Bacteria	Tardiphaga
20be67fe93cc9f6528d6aaddacc059f1_eukaryote	-0.2138	Negative	0.003	Eukaryota	Aphelenchoides
d56db645940d7263cd904f96f3e2258f_eukaryote	0.1963	Positive	0.005	Eukaryota	Bensingtonia
3d572774b274de40d5f878929bb68ee9_eukaryote	0.1558	Positive	0.021	Eukaryota	Colpoda
fa5d2b7bc448a32fa9ec8262e24231be_eukaryote	0.2121	Positive	0.012	Eukaryota	Dioszegia
394dace7cd674dc9355c4f64bfada83f_eukaryote	-0.2138	Negative	0.005	Eukaryota	Hyaloperonospora
cdfb9490b3e043a9832cbace39b2d3fb_eukaryote	0.1576	Positive	0.045	Eukaryota	Plectus
28c42fb75b412baf6c28c32d0ad37e9b_eukaryote	0.1492	Positive	0.028	Eukaryota	Pythium
e0f36c1501288265da47b71dfc9707dd_eukaryote	-0.1784	Negative	0.04	Eukaryota	Taphrina
d7463494a00186665833be74ccdd14a1_eukaryote	-0.1473	Negative	0.028	Eukaryota	Tyrannosorus
9561dff2fb67039404a8a5d6c669959c_fungi	0.2622	Positive	0.001	Fungi	Calloria
9aecac2abcac69ad5a121dabba570b20_fungi	0.1555	Positive	0.04	Fungi	Chalara
08abdffc486630512a1123f8c3bdc96c_fungi	0.2336	Positive	0.002	Fungi	Dioszegia
cd6040e6b124b405e0a57b6b2bc182a8_fungi	-0.2826	Negative	0.001	Fungi	Fusarium
dcd80134a421ba1ee39910e372a24a74_fungi	-0.1718	Negative	0.022	Fungi	Helotiales_gen_Incertae_sedis
1bea8020d2c9d588ad86b87a8f8065e8_fungi	-0.3381	Negative	0.001	Fungi	Knufia
89206af4589b68a36b3313e1be7c6448_fungi	0.2068	Positive	0.016	Fungi	Leucosporidium
bc4dcedbb783ae6fa7d42e19730bbd6a_fungi	0.231	Positive	0.002	Fungi	Leucosporidium
d8f0bf7bd6bfed38440976deac1053de_fungi	-0.2648	Negative	0.004	Fungi	Pleosporales_gen_Incertae_sedis
01355d320b33ddf29a77579fe487ee60_fungi	0.2391	Positive	0.003	Fungi	Sampaiozyma
3594bd84689e1249077661feb03ed8ba_fungi	0.208	Positive	0.004	Fungi	Septoria
f399f80a36b7b63e3071e1397d106116_fungi	0.2101	Positive	0.004	Fungi	Sporobolomyces
12d11cd730ac7a521601a8c9ef2e3f4c_fungi	0.1486	Positive	0.044	Fungi	Teloschistaceae_gen_Incertae_sedis
c99c3c0cde268c3acc40ddb4ca470d52_fungi	0.1617	Positive	0.023	Fungi	Tetracladium
228f3cd62dcd0e0ca5e463f2342f1f82_fungi	0.205	Positive	0.014	Fungi	Thanatephorus
b5b89cca5a0cb0c01db814cb6f693f9f_fungi	0.198	Positive	0.012	Fungi	Vishniacozyma
f797cf2765402dd3d1f72f7838c4a54c_oomycete	-0.2154	Negative	0.01	Stramenopila	Globisporangium
9a72d97ba542c0d4c87ab583eb06188b_oomycete	-0.1801	Negative	0.023	Stramenopila	Peronospora
39d163834966cd25a456abec8a6fb0a4_oomycete	-0.1785	Negative	0.031	Stramenopila	Peronosporaceae_gen_Incertae_sedis
8d7bfbf1d9cc089639fe484763c3f188_oomycete	-0.2217	Negative	0.008	Stramenopila	Pythium

## Sheet: table S2_Strains
table S2. Summary of all microbial strains used in this study.
Genus	species	Strain/Isolate ID	Source	Place of origin	Substrate	Genome assession	ITS/16S
Dioszegia	hungarica	CBS8830	CBS	Austria	Soil (0-5cm) under Populus	N/A	Not sequenced
Dioszegia	hungarica	CBS8635	CBS	Russia	Grass of meadow	N/A	gtaacaaggtttccgtaggtgaacctgcggaaggatcattaataaatggcaaagctttcgagcctagcttttataacatctatacacctgtgaactatttgcctttgggcataaacttaaacataatgtaatgaatgtaatctactataaataaatacaactttcaacaacggatctcttggctctcacatcgatgaagaacgcagcgaaatgcgataagtaatgtgaattgcagaattcagtgaatcatcgaatctttgaacgcaaattgcgccctttggtattccgaagggcatgcctgtttgagtgtcttataaacctcaccctattgtttattcagtagttggtgctttgggtgttgccgtctggctcgccttaaatatctaagtggaatgcgta…
Dioszegia	hungarica	CBS7091	CBS	United Kingdom	Brassica oleacea var. capitata (cabbage)	N/A	acctctacgattgatggcttagtgagatctccggattggcgttagggagccggcaacggcaccctttggctgagaagttgatcaaacttggtcatttagaggaagtaaaagtcgtaacaaggtttccgtaggtgaacctgcggaaggatcattaataaatggcgaagctttcgagcctagcttttatcatcctatacacctgtgaactatttgccttcgggcaccaaacaaacataatgtaatgaatgtaatctactataataaatacaactttcaacaacggatctcttggctctcacatcgatgaagaacgcagcgaaatgcgataagtaatgtgaattgcagaattcagtgaatcatcgaatctttgaacgcaaattgcgccctttggtattccga…
Dioszegia	hungarica	CBS6576	CBS	Unknown	Seawater	N/A	aaggacattaataaacggcaaagctcgcaagagcctagctttaatattattccataacacctgtgaactatttgccttcttgtcatgagaaggtacaaaaccttacaaacataactgtaatgaatgtaatctattataacataatacaactttcaacaacggatctcttggctctcgcatcgatgaaaaacgcagcgaaatgcgataagtaatgtgaattgcaaaattcagtgaatcatcgaatctttgaacgcaacttgcgccctttggtattccgaagggcatgcctgtttgagtgtcatataaacctcacctctactgtttttcattaaacatgtggattggtgctttgggcgtctgccgtttactctggctcgccttaaatgtctaagttggaat…
Dioszegia	hungarica	CBS5124	CBS	USA	Flowers of Lewesia pygmaea	N/A	aaggacattaataatcggcgaagctttcgagcctagctttaaaatatgatatacacctgtgaaactatttgccttcgggcaccaaaccaaacataatgtcaatgaatgtaaacatattataacaaatataactttcaacaacggatctcttggctctcacatcgatgaaaaacgcagcgaaatgcgataagtaatgtgaattgcagaattcagtgaatcatcgaatctttgaacgcagattgcgccctttggtattccgaagggcatgcctgtttgagtgtcttataaacctcacctctactgtttttcattaaacatgtggactggtgctttgggtgttgccgtttactctggctcgccttaaatgtctaagttggaatgcgttaataagttctttcg…
Dioszegia	hungarica	CBS10163 (PT)	CBS	Portugal	Leaves of Acer monspessulanum	This study	GATCATTAATAAATGGCGAAGCTTTCGAGCCTAGCTTTTATCATCCTATACACCTGTGAACTATTTGCCTTCGGGCACCAAACAAACATAATGTAATGAATGTAATCTACTATAATAAATACAACTTTCAACAACGGATCTCTTGGCTCTCACATCGATGAAGAACGCAGCGAAATGCGATAAGTAATGTGAATTGCAGAATTCAGTGAATCATCGAATCTTTGAACGCAAATTGCGCCCTTTGGTATTCCGAAGGGCATGCCTGTTTGAGTGTCTTATAAACCTCACCCCTAATGTTTTATTACAATAGGTTGGTGCTTTGGGTGTTGCCATTTACCTGGCTCGCCTTAAATGACTAAGTGGAATGCGTAATAAGTTCTCGCAACCCTCCACTCTAAT…
Dioszegia	hungarica	EY	This study	Germany (48.45N, 8.78E)	Leaves of Arabidopsis thaliana	This study	CATTAATAAATGGCGAAGCTTTCGAGCCTAGCTTTTATCATCCTATACACCTGTGAACTATTTGCCTTCGGGCACCAAACAAACATAATGTAATGAATGTAATCTACTATAATAAATACAACTTTCAACAACGGATCTCTTGGCTCTCACATCGATGAAGAACGCAGCGAAATGCGATAAGTAATGTGAATTGCAGAATTCAGTGAATCATCGAATCTTTGAACGCAAATTGCGCCCTTTGGTATTCCGAAGGGCATGCCTGTTTGAGTGTCTTATAAACCTCACCCCTAATGTTTTATCACAATAGGTTGGTGCTTTGGGTGTTGCCATTTACCTGGCTCGCCTTAAATGACTAAGTGGAATGCGTAATAAGTTCTCGCAACCCTCCACTCTAATACA…
Dioszegia	hungarica	Y22	This study	Germany (Hamburg)	Leaves of Arabidopsis thaliana	This study	CATTAATAAATGGCGAAGCTTTCGAGCCTAGCTTTTATCATCCTATACACCTGTGAACTATTTGCCTTCGGGCACCAAACAAACATAATGTAATGAATGTAATCTACTATAATAAATACAACTTTCAACAACGGATCTCTTGGCTCTCACATCGATGAAGAACGCAGCGAAATGCGATAAGTAATGTGAATTGCAGAATTCAGTGAATCATCGAATCTTTGAACGCAAATTGCGCCCTTTGGTATTCCGAAGGGCATGCCTGTTTGAGTGTCTTATAAACCTCACCCCTAATGTTTTATTACAATAGGTTGGTGCTTTGGGTGTTGCCATTTACCTGGCTCGCCTTAAATGACTAAGTGGAATGCGTAATAAGTTCTCGCAACCCTCCACTCTAATACA…
Dioszegia	takashimae	CBS10053	CBS	Portugal	Leaves of Quercus faginea	This study	GATCATTAATAAACGGCGAAGCTCGCAAGAGCTTAGCTTTATATTATCCATAACACCTGTGAACTATTTGCCTTCTTGTCATGAGAAGGTACACCTTACAAACATAACTGTAATGAATGTAATCTATTATAACATAATACAACTTTCAACAACGGATCTCTTGGCTCTCGCATCGATGAAGAACGCAGCGAAATGCGATAAGTAATGTGAATTGCAGAATTCAGTGAATCATCGAATCTTTGAACGCAACTTGCGCCCTTTGGTATTCCGAAGGGCATGCCTGTTTGAGTGTCATATAAACCTCACCTCTACTGTTTTTAATTGAACATGTGGATTGGTGCTTTGGGCGTCTGCCGTTTACTCTGGCTCGCCTTAAATGTCTAAGTGGAATGCGTAATA…
Dioszegia	catarinonii	CBS10051	CBS	Portugal	Leaves of Acer monspessulanum	This study	GATCATTAATAAACGGCGAAAGCTCGAAAGAGTCTAGCTTTATATTATTCCATAACACCTGTGAACTATTTGCCTTCTTGTCATGAGAAGGTACAACCTATACAAACATAACTGTAACGAATGTAATCTATTATAACATAATACAACTTTCAACAACGGATCTCTTGGCTCTCGCATCGATGAAGAACGCAGCGAAATGCGATAAGTAATGTGAATTGCAGAATTCAGTGAATCATCGAATCTTTGAACGCAACTTGCGCCCTTTGGTATTCCGAAGGGCATGCCTGTTTGAGTGTCATATAAACCTCACCTCTACTGTTTTTCATTAAACATGTGGATTGGTGCTTTGGGCGTCTGCCGTTTACTCTGGCTCGCCTTAAATGTCTAAGTGGAATGCGT…
Dioszegia	aurantiaca	WH.Y070	This study	Germany (48.51N, 8.94E)	Leaves of Arabidopsis thaliana	This study	ATCATTAATAAATGGCGAAAGCTTTCTATTATCCATAACACCTGTGAACTATTTGCCTTCGGGCACCAAACCAAACATAATGTAATGAATGTAATCTACTATAATAAATATAACTTTCAACAACGGATCTCTTGGCTCTCACATCGATGAAGAACGCAGCGAAATGCGATAAGTAATGTGAATTGCAGAATTCAGTGAATCATCGAATCTTTGAACGCAGATTGCGCCCTTTGGTATTCCGAAGGGCATGCCTGTTTGAGTGTCTTATAAACCTCACCTCTATAGTTTTCTATAGTTGTGCTTTGGGTGTTGCCGTTTACTCTGGCTCGCCTTAAATGTCTAAGTGGAATGCGTAATAAGTTCTCGCAACCCTCCACTCTAACACACTTTATATTCTGA…
Dioszegia	aurantiaca	WH.Y079	This study	Germany (48.51N, 8.94E)	Leaves of Arabidopsis thaliana	This study	CATTAATAAATGGCGAAAGCTTTCTATTATCCATAACACCTGTGAACTATTTGCCTTCGGGCACCAATCCAAACATAATGTAATGAATGTAATCTACTATAATAAATATAACTTTCAACAACGGATCTCTTGGCTCTCACATCGATGAAGAACGCAGCGAAATGCGATAAGTAATGTGAATTGCAGAATTCAGTGAATCATCGAATCTTTGAACGCAGATTGCGCCCTTTGGTATTCCGAAGGGCATGCCTGTTTGAGTGTCTTATAAACCTCACCTCTATAGTTTTCTATAGTTGTGCTTTGGGTGTTGCCGTTTACTCTGGCTCGCCTTAAATGTCTAAGTGGAATGCGTAATAAGTTCTCGCAACCCTCCACTCTAACACACTTTATATTCTGACC…
Dioszegia	buhagiarii	CBS10054	CBS	Portugal	Leaves of Acer monspessulanum	This study	GATCATTAATAAATGGGCGCAAGCCTTTATTATCCTATACACCTGTGAACTATTGCCTTCGGGCGTATCCAAACATAATGTAACGAATGTAATCTATTATAACAAATATAACTTTCAACAACGGATCTCTTGGCTCTCACATCGATGAAGAACGCAGCGAAATGCGATAAGTAATGTGAATTGCAGAATTCAGTGAATCATCGAATCTTTGAACGCAGATTGCGCCCTTTGGTATTCCGAAGGGCATGCCTGTTTGAGTGTCTTATAAACCTCACCTCTAATGTTTTCTCATTAGTCGTGCTTTGGGTGTTGCCATTGGCTCGCCTTAAATGCCTAAGTGGAATGCGTAATAAGTTCTCGCAATCCTCCACTCTAACACTTTTATATTCTGACCTCAAA…
Dioszegia	fristingensis	ERG.Y128	This study	Germany (48.50N, 8.81E)	Leaves of Arabidopsis thaliana	This study	CATTAATAAACGGCGACGCTTTCGAGCTTAGCTTTTATATCCTTATACACCTGTGAACTATTTGCCTTTGGGCACAAACTTAAACATAATGTAATGAATGTAAACTATTATAACAAATACAACTTTCAACAACGGATCTCTTGGCTCTCACATCGATGAAGAACGCAGCGAAATGCGATAAGTAATGTGAATTGCAGAATTCAGTGAATCATCGAATCTTTGAACGCAAATTGCGCCCTTTGGTATTCCGAAGGGCATGCCTGTTTGAGTGTCTTATAAACCTCCAACTATAGTTTATTCTGTAGTTGGCTTTGGGTGCTGCCAGCGATGGCTCGCCTTAAATGTCTAAGTGGAATGCATAATAAGTTCTTGCAACCCTCCACTCTAACACACTTTATA…
Dioszegia	fristingensis	K69.Y031	This study	Germany (48.54N, 9.09E)	Leaves of Arabidopsis thaliana	This study	CATTAATAAACGGCGACGCTTTCGAGCTTAGCTTTTATATCCTTATACACCTGTGAACTATTTGCCTTTGGGCACAAACTTAAACATAATGTAATGAATGTAAACTATTATAACAAATACAACTTTCAACAACGGATCTCTTGGCTCTCACATCGATGAAGAACGCAGCGAAATGCGATAAGTAATGTGAATTGCAGAATTCAGTGAATCATCGAATCTTTGAACGCAAATTGCGCCCTTTGGTATTCCGAAGGGCATGCCTGTTTGAGTGTCTTATAAACCTCCAACTATAGTTTATTCTGTAGTTGGCTTTGGGTGCTGCCAGCGATGGCTCGCCTTAAATGTCTAAGTGGAATGCATAATAAGTTCTTGCAACCCTCCACTCTAACACACTTTATA…
Sphingomonas	faeni	ERG1.4	Höhn et al. (2025)	Germany (48.50N, 8.81E)	Leaves of Arabidopsis thaliana	NCBI: JALPNF000000000	N/A
Microbacterium	proteolyticum	I35	Höhn et al. (2025)	Germany (48.56N, 9.13E)	Leaves of Arabidopsis thaliana	NCBI: JAFKOM000000000	N/A
Leucosporidium	scottii	WH.Y086	This study	Germany (48.51N, 8.94E)	Leaves of Arabidopsis thaliana	N/A	CCTGCGGAAGGATCATTAGTGAATATTAGCGCATCTCTTCGGAGAGCGTGACCTCCACTTTCTAACTCTGTGCATTTATTTGGCGGGAAACTATGTAGATCAGTAGTAATACTCGAACTACATGTTTCCTGCGGCTCATTTTATAACACTAGTTAAAGTATGTAACGAAATATCGAAACAAAAAAAAACTTTCAACAACGGATCTCTTGGCTTGCTCATCGATGAAGAACGCAGCGAAATGTGATAAGTAATGTGAATTGCAGAATTCAGTGAATCATCGAATCTTTGAACGCACCTTGCGCTCCGTGGTATTCCGCGGAGCATGTCTGTTTGAGTGTCATGAACTCTTCAACCCACCAGTTTCTTGTAGACTGATTGGTGTTTGGATTTTGAGCGTTG…
Leucosporidium	scottii	WH.Y075	This study	Germany (48.51N, 8.94E)	Leaves of Arabidopsis thaliana	N/A	CATTAGTGAATATTAGCGTGTCTTTGCTTCGTGCAAGAGCGTGACCTCCACTTTCTAACTCTGTGCACTATATGGCGGAATTGAAGAGAGCAATCTCTAAAGTTCCGCGGCTCATTTTAAAACACTAGTTAAAGAATGTAACGAAATATCGAAACAAAAAAAAACTTTCAACAACGGATCTCTTGGCTCTCGCATCGATGAAGAACGCAGCGAAATGTGATAAGTAATGTGAATTGCAGAATTCAGTGAATCATCGAATCTTTGAACGCACCTTGCGCTCCCTGGTATTCCGGGGAGCATGTCTGTTTGAGTGTCATGAACTCTTCAACCCACCGGTTTCTTGTATTCCGGCTGGTGTTTGGTTTCTGAGCGTCTGCTCGTCCTTTGTGACTGAGCTCG…
Sampaiozyma	ingeniosa	ERG.Y027	This study	Germany (48.50N, 8.81E)	Leaves of Arabidopsis thaliana	N/A	CCTGCGGAAGGATCATTAGTGAATTTTAGCGCGTCTACTTCGGTAGAGCGTGACCTCCACTTTCTAACTCTGTGCACTATATGGCGGAACTCGTGGAAGAGAGTCAAATCTCGGAAACAGGTTCTGCGGCTCATTTTAAAACACTAGTTAAAGAATGTAACGAAATATCGAAACAAAAAAAAACTTTCAACAACGGATCTCTTGGCTCTCGCATCGATGAAGAACGCAGCGAAATGTGATAAGTAATGTGAATTGCAGAATTCAGTGAATCATCGAATCTTTGAACGCACCTTGCGCTCCCTGGTATTCCGGGGAGCATGTCTGTTTGAGTGTCATGAACTCTTCAACCCACCGGTTTCTTGTAAACCGGCTGGTGTTTGGTTTCTGAGCGTCTGCTCG…
Rhodotorula	glutinis	WH.Y055	This study	Germany (48.51N, 8.94E)	Leaves of Arabidopsis thaliana	N/A	ATTAGTGAATCTAGGACGTCCAACTTAACTTGGAGTCCGAACTCTCACTTTCTAACCCTGTGCATCTGTTAATTGGAATAGTAGCTCTTCGGAGTGAACCACCATTCACTTATAAAACACAAAGTCTATGAATGTATACAAATTTATAACAAAACAAAACTTTCAACAACGGATCTCTTGGCTCTCGCATCGATGAAGAACGCAGCGAAATGCGATACGTAATGTGAATTGCAGAATTCAGTGAATCATCGAATCTTTGAACGCACCTTGCGCTCCTTGGTATTCCGAGGAGCATGCCTGTTTGAGTGTCATGAAATCTTCAACCCACCTCTTTCTTAGTGAATCTGGTGGTGCTTGGTTTCTGAGCGCTGCTCTGCTTCGGCTTAGCTCGTTCGTAAT…
Vishniacozyma	victoriae	K69.Y037	This study	Germany (48.54N, 9.09E)	Leaves of Arabidopsis thaliana	N/A	CATTAATAGTGCCCATTGATGCAAATCATTGGGTTAGATCTGCCCTTATCGCAAGATGAGGGCTTCCATATACACCGTGAACTGTGGCTTCGGCCATCACAAACTGTTAGTAATGAATGTAATATCATAACAAAAACAAAACTTTTAACAACGGATCTCTTGGCTCTCGCATCGATGAAGAACGCAGCGAAATGCGATAAGTAATGTGAATTGCAGAATTCAGTGAATCATCGAATCTTTGAACGCACCTTGCGCCCTTTGGTATTCCGAAGGGCATGCCTGTTTGAGTGTCATGAAACCTCACCCCACTTAGGTTTTTGCCTAAGCGGTGGTGTATTGGGTGTTTGCCTTGCTAAAGGCTCGCCTTAAAGATATAAGCACCTTGGATGTAATACGTTT…
Stagonosporopsis	sp.	WH.F67	This study	Germany (48.51N, 8.94E)	Leaves of Arabidopsis thaliana	N/A	ATTACCTAGAGTTGTAGGCTTTGCCTGCTATCTCTTACCCATGTCTTTTGAGTACCTTCGTTTCCTCGGCGGGTCCGCCCGCCGATTGGACAATTTAAACCGTTTGCAGTTGCAATCAGCGTCTGAAAAAACTTAATAGTTACAACTTTCAACAACGGATCTCTTGGTTCTGGCATCGATGAAGAACGCAGCGAAATGCGATAAGTAGTGTGAATTGCAGAATTCAGTGAATCATCGAATCTTTGAACGCACATTGCGCCCCTTGGTATTCCATGGGGCATGCCTGTTCGAGCGTCATTTGTACCTTCAAGCTCTGCTTGGTGTTGGGTGTTTGTCTCGCCTCTGCGCGTAGACTCGCCTCAAAACAATTGGCAGCCGGCGTATTGATTTCGGAGCGCA…
Sporobolomyces	ellipsoideus	K69.Y111	This study	Germany (48.54N, 9.09E)	Leaves of Arabidopsis thaliana	N/A	TGAATAACAAGGGTGTCCAATTTAACTTGGAACCCGACCTTCTCACATCTAACCCTGTGCATCTGTTTTAATGGCGAGCAGCTCGAAAGAGTTGTGAGCCGTTTCACTTTACAAACACTAGTCTATGAATGTAATCTTTTTATAACAAATAAAAACTTTCAACAACGGATCTCTTGGCTCTCGCATCGATGAAGAACGCAGCGAAATGCGATACGTAATGTGAATTGCARAATTCAGTGAATCATCGAATCTTTGAACGCATCTTGCGCTCTCTGGTATTCCGGAGAGCATGTCTGTTTGAGTGTCATGAATTCTTCAACCCAACTGTTTCTTGTAAACAGCTGGCGTTTGGATTCTGAGCGCTGCTGGCTTCGTGCCTAGCTCGTTCGTAATACATCA…
Cystofilobasidium	macerans	ERG.Y126	This study	Germany (48.50N, 8.81E)	Leaves of Arabidopsis thaliana	N/A	CACTAAAGTAAACGCCCTCCGGGGCTCTCTTTAATTCACACACCCCTGTGCACTTTGGCCACCTGCCGCGCTTTACTGCGTTAGTAGGTGTGTCTTTTTAACTATACACTATATACACAAGTCATTGAATGTAAAATCGTTATAAACTAATATAACTTTCAACAACGGATCTCTTGGTTCTCGCATCGATGAAGAACGCAGCGAATTGCGATAAGTAATGTGAATTGCAGAATTCAGTGAATCATCGAATCTTTGAACGCATCTTGCGCTCTTTGGTATTCCGAAGAGCATGCCTGTTTGAGTGTCATGAAACTCTCACCTCCAGCCTTCTTTAATTAGAGGTGTTGGGGCGTGGACGTGAGTGCTGCTGGTGCCCTGGTTGCATCGGCTCACTTGAAA…
Fusarium	avenaceum	ERG.F51	This study	Germany (48.50N, 8.81E)	Leaves of Arabidopsis thaliana	N/A	CATTACCGAGTTTACAACTCCCAAACCCCTGTGAACATACCTTAATGTTGCCTCGGCGGATCAGCCCGCGCCCCGTAAAACGGGACGGCCCGCCAGAGGACCCAAACTCTAATGTTTCTTATTGTAACTTCTGAGTAAAACAAACAAATAAATCAAAACTTTCAACAACGGATCTCTTGGTTCTGGCATCGATGAAGAACGCAGCAAAATGCGATAAGTAATGTGAATTGCAGAATTCAGTGAATCATCGAATCTTTGAACGCACATTGCGCCCGCTGGTATTCCGGCGGGCATGCCTGTTCGAGCGTCATTTCAACCCTCAAGCCCCCGGGTTTGGTGTTGGGGATCGGCTCTGCCCTTCTGGGCGGTGCCGCCCCCGAAATACATTGGCGGTCTCGC…
Albugo	laibachii	Nc14	Kemen et al. (24)	United Kingdom (Norwich)	Leaves of Arabidopsis thaliana	JGI :Go0039138	N/A

## Sheet: table S3_Genomes
table S3. Dioszegia genomes used and generated in this study. The basic stats of the genome is assess with stats.sh script from the BBmap package.
Species	Strain/Isolate ID	Source	Sequencing technology	Genome size (MB)	No. of scaffolds	N/L50 scaffolds	NCBI Accession	Detection of DhPER1 homologous gene
D. hungarica	CBS10163 (PT)	This study	PacBio	21.6	20	2/3.022 MB	JBLAVX000000000	Yes
D. hungarica	EY	This study	PacBio	21.6	23	1/10.86 MB	JBLAVW000000000	Yes
D. hungarica	Y22	This study	Illumina	21.3	194	10/594.582 KB	JBLAVY000000000	Yes
D. hungarica	PDD-24b-2	Jarrige et al. (33)	PacBio& Illumina	21	17	4/2.166 MB	See reference	Yes
D. takashimae	CBS10053	This study	Illumina	21.8	342	18/359.349 KB	JBLAVZ000000000	Yes
D. catarinonii	CBS10051	This study	Nanopore	21.3	19	6/1.523 MB	JBLAWA000000000	Yes
D. aurantiaca	WH.Y070	This study	Illumina	20.5	148	11/559.685 KB	JBLAWD000000000	No
D. aurantiaca	WH.Y079	This study	Illumina	20.8	156	11/623.139 KB	JBLAWE000000000	No
D. aurantiaca	JCM_2956	Takashima et al. (37)	Illumina	19.3	52	5/1.283 MB	See reference	No
D. buhagiarii	CBS10054	This study	Illumina	19.6	320	17/367.827 KB	JBLAWF000000000	No
D. fristingensis	ERG.Y128	This study	Illumina	19.7	158	8/827.001 KB	JBLAWB000000000	No
D. fristingensis	K69.Y031	This study	Illumina	18.8	581	5/900.88 KB	JBLAWC000000000	No
D. cryoxerica	ANT03-071	Connell et al. (38)	Illumina	39.5	856	96/124.269 KB	See reference	Yes
D. crocea	JCM2961	Takashima et al. (37)	Illumina	20.6	26	4/1.955 MB	See reference	No

## Sheet: table S4_tAI
table S4. List of thiamine related genes in Dioszegia EY and PT and their percent ranks of tAI in each genomes.
Gene_description	Gene_ID_EY	Gene_ID_PT	EY_percent_rank	PT_percent_rank
Transkelotase1	FUN_003051	FUN_002963	3.3	3.1
DhPER3	FUN_001224	FUN_001142	3.9	4.3
DhPER5	FUN_000041	FUN_007859	4.4	8.8
DhPER1	FUN_005879	FUN_007304	4.9	5.7
Thiamine_pyrophasphate_enzyme2	FUN_005438	FUN_005559	5.2	14.7
Transkelotase2	FUN_006154	FUN_007584	6.4	7.1
Transkelotase3	FUN_005617	FUN_005385	8.6	10.1
DhPER2	FUN_004490	FUN_004412	10.4	12.9
Thiamine_pyrophasphate_enzyme1	FUN_002030	FUN_001946	13.6	15.2
DhPER4	FUN_003616	FUN_003517	25.5	41.7
Secondary_thiamine_phosphate_synthase	FUN_004585	FUN_004506	56.7	86.3
THI5	FUN_004438	FUN_004358	63.8	59.5
Thiamine_pyrophosphokinase	FUN_005438	FUN_005559	71.7	71
Thiamine_monophosphate_synthase	FUN_000570	FUN_000472	96.3	96.8

## Sheet: tableS5_Coordinates
table S5 : GPS coordinates and climatic variables of each site.
Site	Country	Latitude (GPS coord)	Longitude (GPS coord)	Elevation (masl)	Average Temp (annual)(Â°C)	Average Minimum Temp (annual)(Â°C)	Absolute Minimum Temp (month)(Â°C)	Average Maximum Temp (Â°C) (annual)	Absolute Maximum Temp (month) (Â°C)	Average Annual Precip (mm)	Absolute Minimum Precip (mm)	Absolute Maximum Precip (month) (mm)
JUG	DE	48.56	9.13	431	9.21	4.83	-25.6	13.6	37.7	704	0.4	198
K6	DE	48.54	9.09	433	9.21	4.83	-25.6	13.6	37.3	702	0.4	199.6
EY	DE	48.45	8.78	386	9.21	4.83	-25.6	13.7	37.7	703.5	0.4	200
PFN	DE	48.56	9.11	455	9.21	4.83	-25.8	13.7	37.7	703.2	0.4	199.9
WH	DE	48.51	8.94	387	9.21	4.83	-25.6	13.7	37.7	703	0.4	195
ERG	DE	48.5	8.81	471	9.21	4.83	-25.6	13.7	37.3	702	0.4	197
UPP	SE	59.43	17.02	33	6.32	1.95	-33.4	10.71	32.6	440.65	1.7	110.7
KFC	SE	62.81	18.2	179	3.1	-1.27	-34.7	7.36	32	718.39	0.7	323.7
KFB	SE	63.07	18.32	31	3.1	-1.27	-34.7	7.36	32	718.39	0.7	323.7
KFA	SE	63.02	18.32	31	3.1	-1.27	-34.7	7.36	32	718.39	0.7	323.7
SLY	ES	41.8	-3.11	1022	9.82	3.5	-2.3	16.1	28.2	657.6	25.9	78.3
MAR	ES	39.58	-3.93	1024	12.68	6.2	-0.9	19.2	32.5	488.5	12.6	62.8
CDC	ES	41.21	-4.55	787	12.31	5.8	-0.3	18.5	30.6	439.7	14.9	51.5
CH	FR	43.31	1.52	198	12.8	5.4	1.1	20.2	26.9	719	44	76
LA	FR	43.56	1.65	246	12.5	5.1	0.8	19.9	26.7	749	43	78

## Sheet: tableS6_Primers
table S6. Oligo nucleotides used in this study. Different color fill represents primers used in different experiments.
Oligo ID	Direction	Sequence	Description
B341F	FWD	CCTACGGGAGGCAGCAG	Bacteria - V3/V4 (BacV3)
B806R	REV	GGACTACHVGGGTWTCTAAT	Bacteria - V3/V4 (BacV3)
799F	FWD	AACMGGATTAGATACCCKG	Bacteria - V5/V6 (BacV5)
1192R	REV	ACGTCATCCCCACCTTCC	Bacteria - V5/V6 (BacV5)
ITS1F	FWD	CTTGGTCATTTAGAGGAAGTAA	Fungi ITS 1 (Ftrad)
ITS2	REV	GCTGCGTTCTTCATCGATGC	Fungi ITS 1 (Ftrad)
fITS7	FWD	GTGARTCATCGAATCTTTG	Fungi ITS 2 (FITS)
ITS4	REV	TCCTCCGCTTATTGATATGC	Fungi ITS 2 (FITS)
ITS1-O	FWD	CGGAAGGATCATTACCAC	Oomycete ITS1 (Otrad)
5.8s-O-Rev	REV	AGCCTAGACATCCACTGCTG	Oomycete ITS1 (Otrad)
5.8s-O-Fwd-deg	FWD	TTGAACGCAYATTGCACTT	Oomycete ITS 2 (OITS)
ITS4	REV	TCCTCCGCTTATTGATATGC	Oomycete ITS 2 (OITS)
G001 F566	FWD	CAGCAGCCGCGGTAATTCC	18S V4-5 Primers (PrV4)
G002 R1200	REV	CCCGTGTTGAGTCAAATTAAGC	18S V4-5 Primers (PrV4)
G003 F1422	FWD	ATAACAGGTCTGTGATGCCC	18S V9 Primers (PrV9)
G004 R1797	REV	TGATCCTTCTGCAGGTTCACCTAC	18S V9 Primers (PrV9)
Gc002	FWD	TTGTCCCTTCGGTCGGCGATACGCTCCTGGTCTTA	Forward blocking oligos for A.thaliana, binding with the 18S
Gc003	REV	GTGCCAGCGGAGTCCTATAAGCAACATCCGCTGAT	Reverse blocking oligos for A.thaliana, binding with the 18S
Gc010	FWD	TGGATTTCTGATTCGAGCGTCCGGTCCGCTTCTTTTAGGA	Forward blocking oligo for A.laibachii, binding with the 18S
Gc012	REV	CGGTGCTGACAAGGTCATTTAAAGTAAACGACTGCCAATC	Reverse blocking oligo for A.laibachii, binding with the 18S
Nc14_EF1a_F_q	FWD	GTGTTCTGCACATCCACACC	qPCR primer for EF1a gene of A. laibachii Nc14
Nc14_EF1a_R_q	REV	GACCTTGACGGATGAAAGGA	qPCR primer for EF1a gene of A. laibachii Nc14
AT_EF1a_F_q	FWD	AAGGAGGCTGCTGAGATGAA	qPCR primer for EF1a gene of A. thaliana
AT_EF1a_R_q	REV	TGGTGGTCTCGAACTTCCAG	qPCR primer for EF1a gene of A. thaliana
YH8	FWD	TGCCCAAACCGTCCGAGTTC	Designed to amplify potential Permease for Thiamine from Dioszegia strains, bind with position 2-21 in the alignment
YH13	RWD	GATACCGAATGCTTCAGCGAC	Designed to amplify potential Permease for Thiamine from Dioszegia strains, reverse complement
YH18	FWD	AAGTTCGTCAAGTCCGGTGAC	Forward primer designed for internal control for qPCR in Dioszegia hungarica, bind with EF1a gene, Tm59.8
YH19	REV	CAAAAGTCAACATGTGGGAATGTTC	Reverse primer designed for internal control for qPCR in Dioszegia hungarica, bind with EF1a gene, Tm59.5
YH32	FWD	CGCCACCTTCGCTCGACAT	Forward primer used for seqquencing the mutant EYDper1, bind at the 20bps upstrean of the start codon of DhPER1
YH28	FWD	CAAAATTCCATTCTACAACGGTTGATCCGGAGCCGGAACTGTTTTAGAGCTAGAAATAGC	sgRNA for targeting Dioszegia Permease, underscore indicates the CRISPR target
YH54	FWD	TACTGGCACGGCTTCAACCCGATGGCCGAACGTGGTAAC	gibson primers to clone the Hyg resistance gene from pCas9HF1-HYG into EC35, together with EY Permease gene. Color part indicates the overhang for Gibson cloning.
YH55	REV	TCTGCAGTCGACGGGCCCGGGATCCTCATGTTTGACAGCTTATCATCG	gibson primers to clone the Hyg resistance gene from pCas9HF1-HYG into EC35, together with EY Permease gene. Color part indicates the overhang for Gibson cloning.
YH56	FWD	GACCTCGGTCTCGGCAGGTCTAGCAAAATTCCATTCTACAACGGTACC	gibson primers to clone the hsp70 promoter from the pCas9HF1-HYG into EC35, bind with the 25 bps upstream of the promoter. Color part indicates the overhang for Gibson cloning.
YH57	REV	GGATCCTGTGAAATCTAAAACTTTTGC	gibson primers to clone the hsp70 promoter from the pCas9HF1-HYG into EC35, bind with the 3' of the promoter
YH58	FWD	GCAAAAGTTTTAGATTTCACAGGATCCATGCGCTTTCCCACCATGC	gibson primers to clone the CDS and terminator of EY Per gene into EC35, bind with the beginning of CDS, use with YH53. Color part indicates the overhang for Gibson cloning.
YH64	REV	CGGCCTGCCTGGTATCTGTA	gibson primers to clone the whole permease gene into EC35, bind with the predicted terminator
YH67	FWD	GACCTCGGTCTCGGCAGGTCTAGGATGGCCGAACGTGGTAAC	gibson primers to clone the Hyg resistance gene from pCas9HF1-HYG into EC35, together with YH55. Color part indicates the overhang for Gibson cloning.
YH1	FWD	CCTGAAGCGCAGATCAAGGAGAG	Designed to amplify Thiamine Pyrophosphate enzymes from Dioszegia strains, bind with 270-289 in the alignment
YH2	REV	GTAGCCCATCGTCCCGAGAC	Designed to amplify Thiamine Pyrophosphate enzymes from Dioszegia strains, bind with 1687-1706 in the alignment
YH3	FWD	GCTATCCTTCCCGTCTTTGACGC	Designed to amplify Thiamine Pyrophosphate enzymes from Dioszegia strains, bind with 438-460 in the alignment
YH4	REV	GCACCGTGCATTCCGATCATGTG	Designed to amplify Thiamine Pyrophosphate enzymes from Dioszegia strains, bind with 1173-1195 in the alignment
YH5	FWD	GTATCCATATCGGCCAATCCGAC	Designed to amplify Thiamine Phosphate Pyrophorelase/Thiamine Monophosphate Synthase from Dioszegia hungarica EY and PT, bind with 2906 - 2928 in the alignment
YH6	FWD	CTGCACCTGCTTCAGCTCCTG	Designed to amplify Thiamine Phosphate Pyrophorelase/Thiamine Monophosphate Synthase from Dioszegia hungarica EY and PT, bind with 2729 - 2749 in the alignment
YH7	REV	CTGGACGAGTTGTGACTCCTC	Designed to amplify Thiamine Phosphate Pyrophorelase/Thiamine Monophosphate Synthase from Dioszegia hungarica EY and PT, bind with 4120 - 4140 in the alignment
YH9	REV	CATGACCTCAACGCAAAGACC	Designed to amplify potential Permease for Thiamine from Dioszegia strains (EY but not PT), bind with 384-404 in the alignment
YH10	FWD	GCCTTGGCAGAAGACTTTCAC	Designed to amplify secondary thiamine-phosphate synthase enzyme from Dioszegia strains (EY but not PT), bind with 2-21 in the alignment
YH11	REV	CAAGATGGTAGCGACTACCTTAC	Designed to amplify secondary thiamine-phosphate synthase enzyme from Dioszegia strains (EY but not PT), bind with 410-432 in the alignment
YH12	FWD	GTCGCTGAAGCATTCGGTATC	Designed to amplify potential Permease for Thiamine from Dioszegia strains , bind with 66-86 in the alignment
YH14	FWD	CTGCGTCTACGGTGTCAACTT	Designed to amplify potential Permease for Thiamine from Dioszegia strains (EY but not PT), bind with 213-233 in the alignment
YH15	RWD	AAGTTGACACCGTAGACGCAG	Designed to amplify potential Permease for Thiamine from Dioszegia strains (EY but not PT), bind with 213-233 in the alignment, reverse complement
YH16	FWD	GCTGCACTGTATGCACACTTC	Designed to amplify secondary thiamine-phosphate synthase enzyme from Dioszegia strains (EY but not PT), bind with120-140 in the alignment
YH17	RWD	CACTTCCTCTTCCGCCCCA	Designed to amplify secondary thiamine-phosphate synthase enzyme from Dioszegia strains (EY but not PT), bind with388-406 in the alignment
