# Supplementary figures and images for: A vitamin cross-feeding mechanism mediates microbial niche adaptation on leaves
Source: Research Square preprint supplement (doi:10.21203/rs.3.rs-8234549/v1), 2026-01-08

A

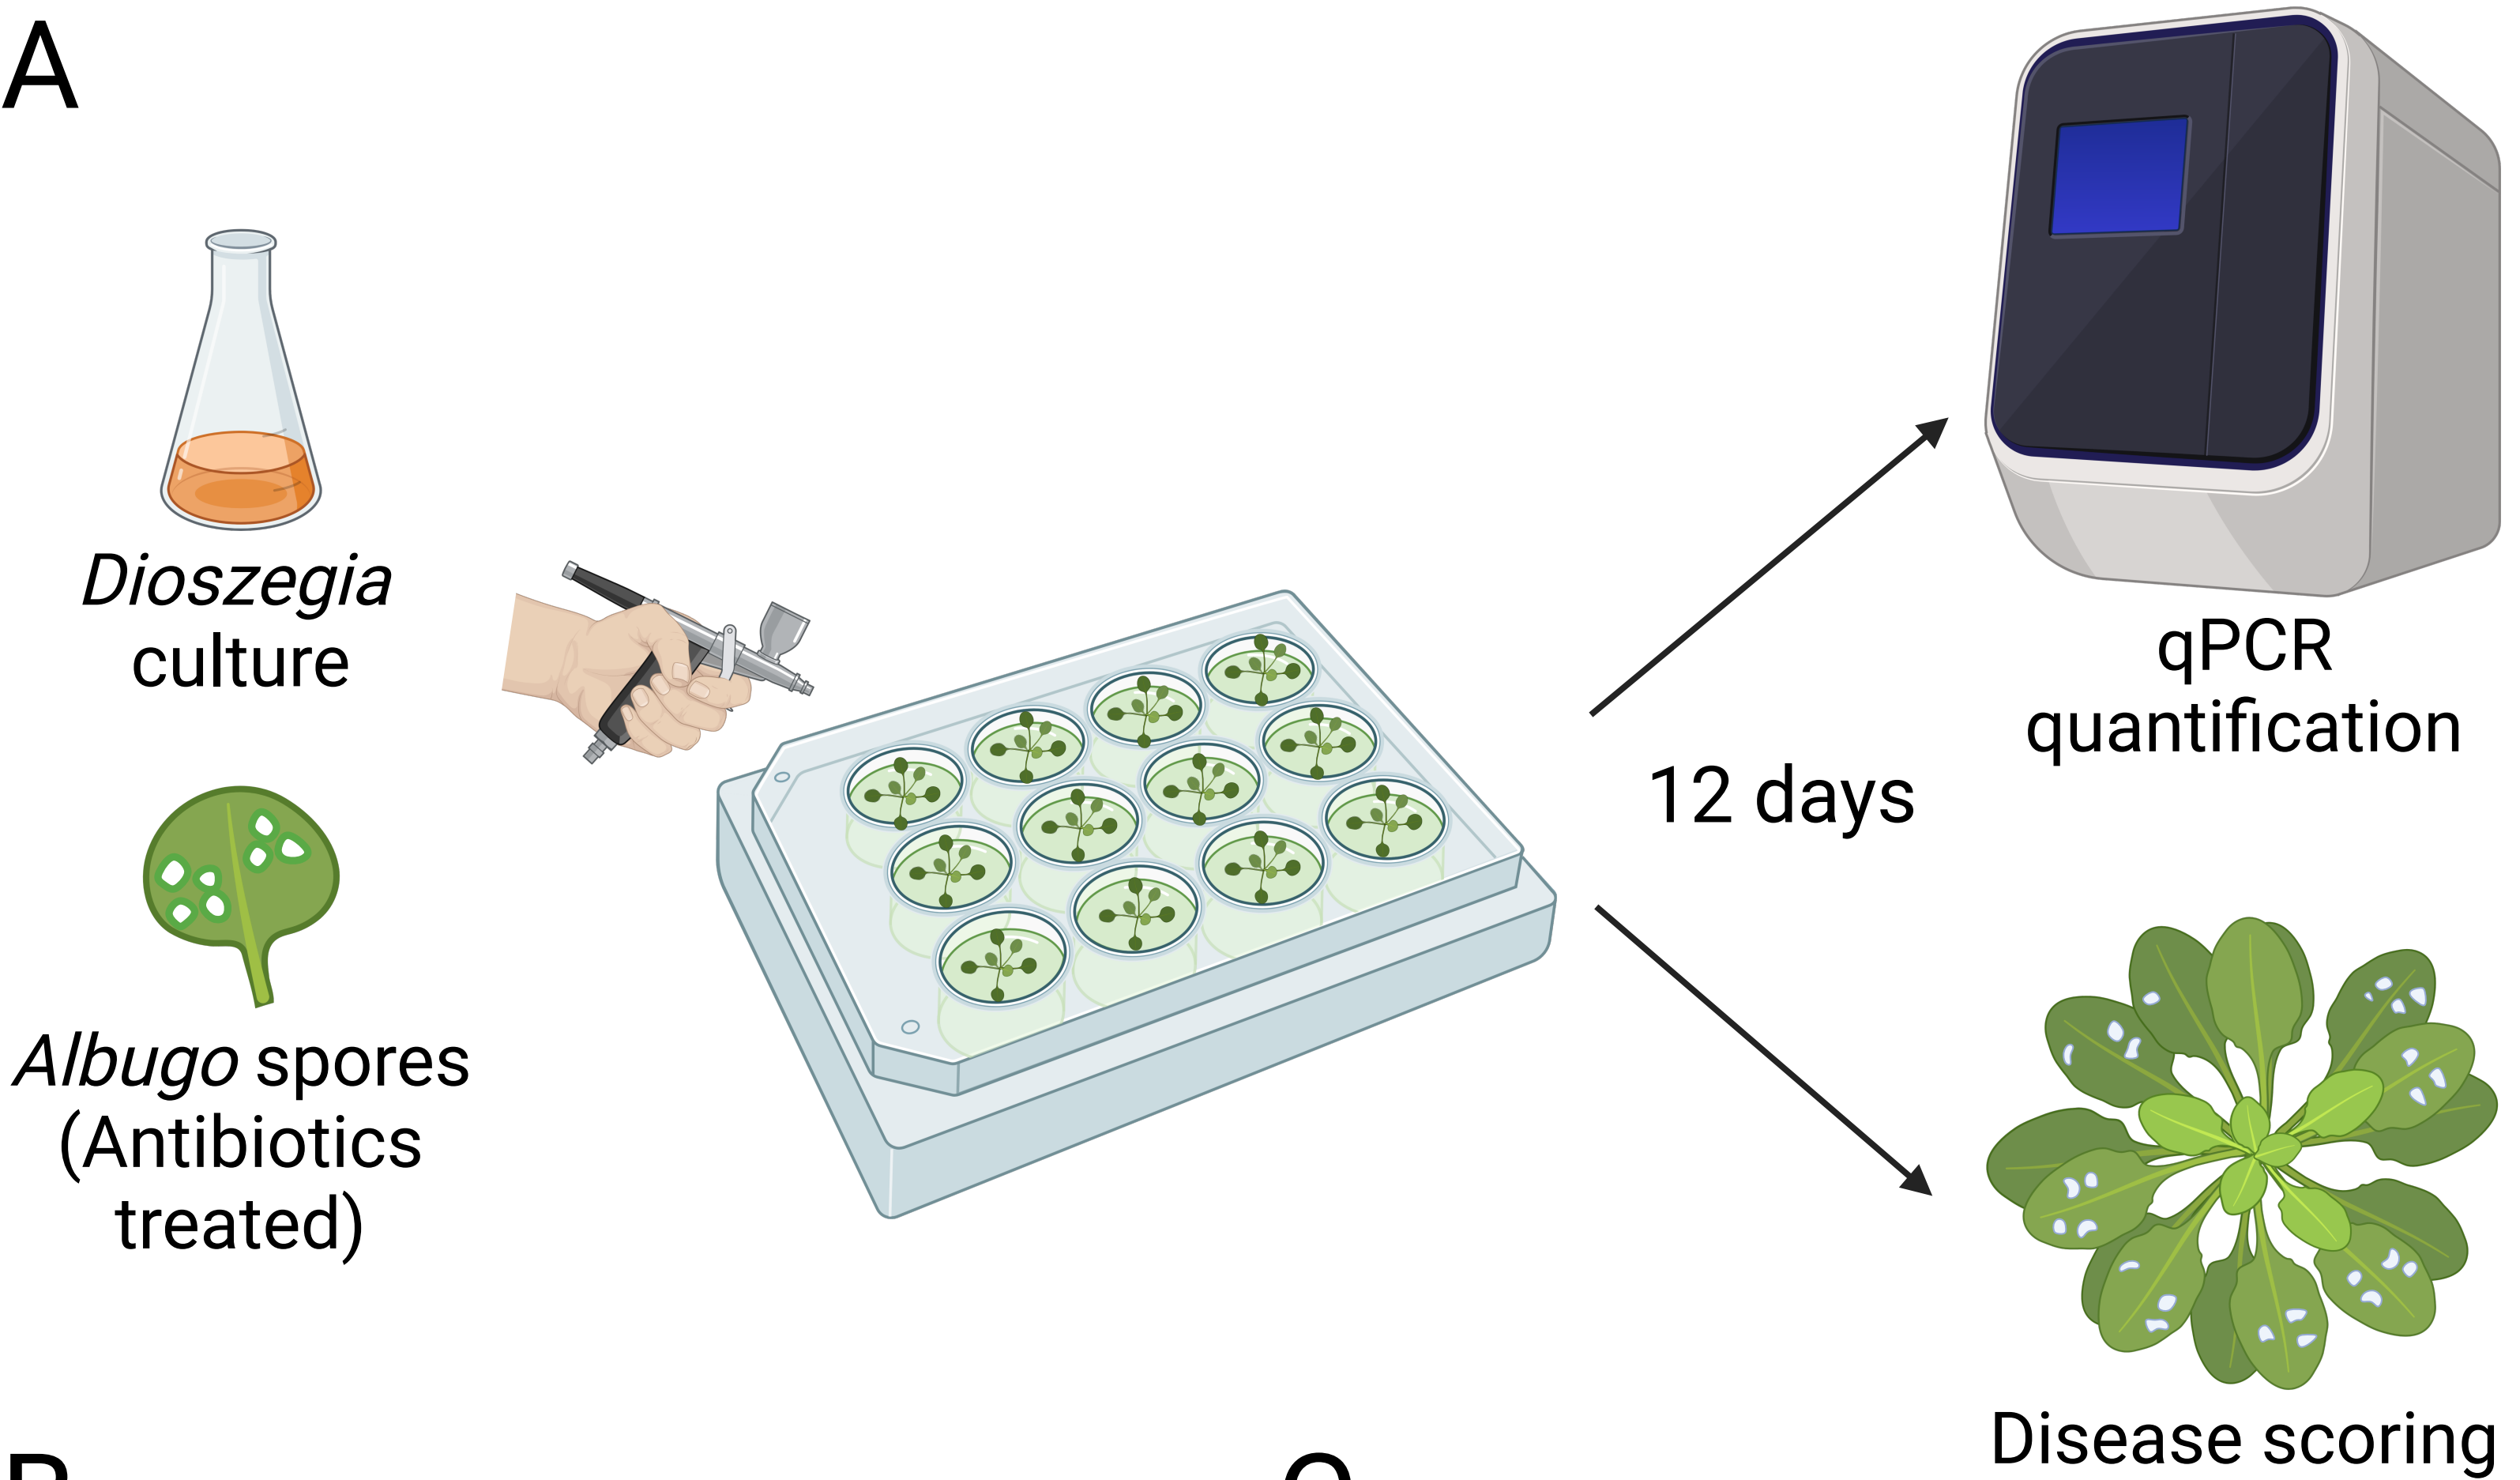

B

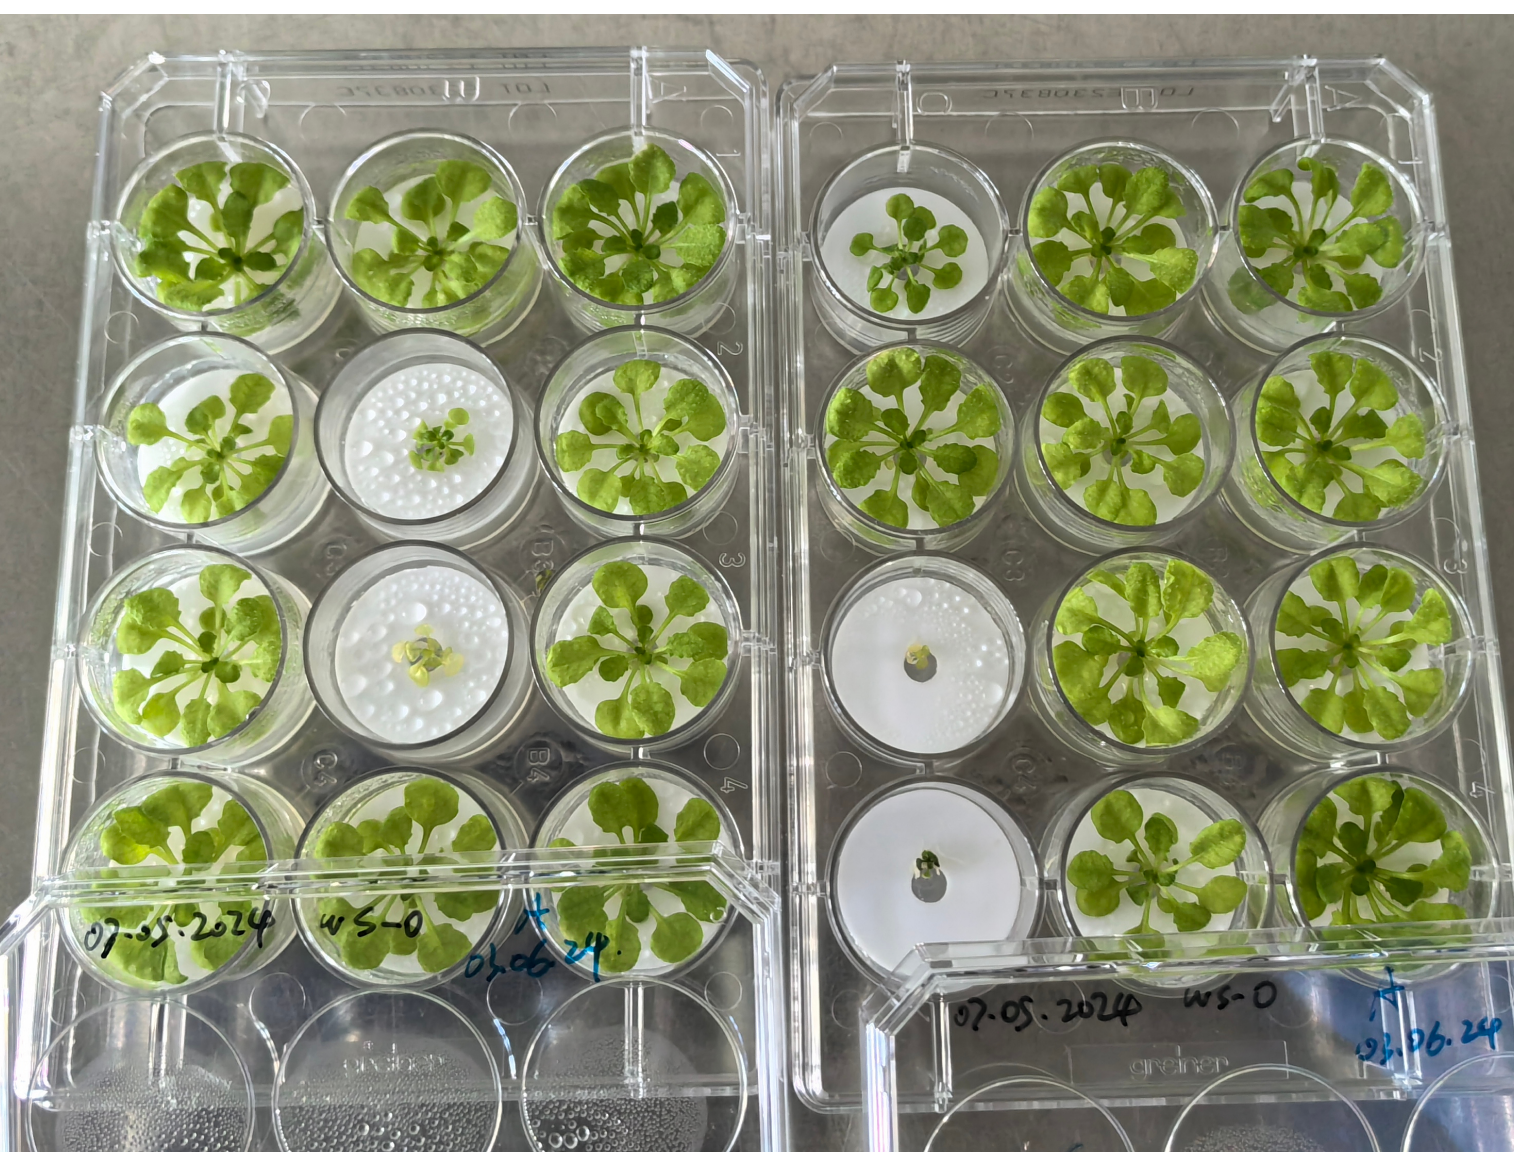

C

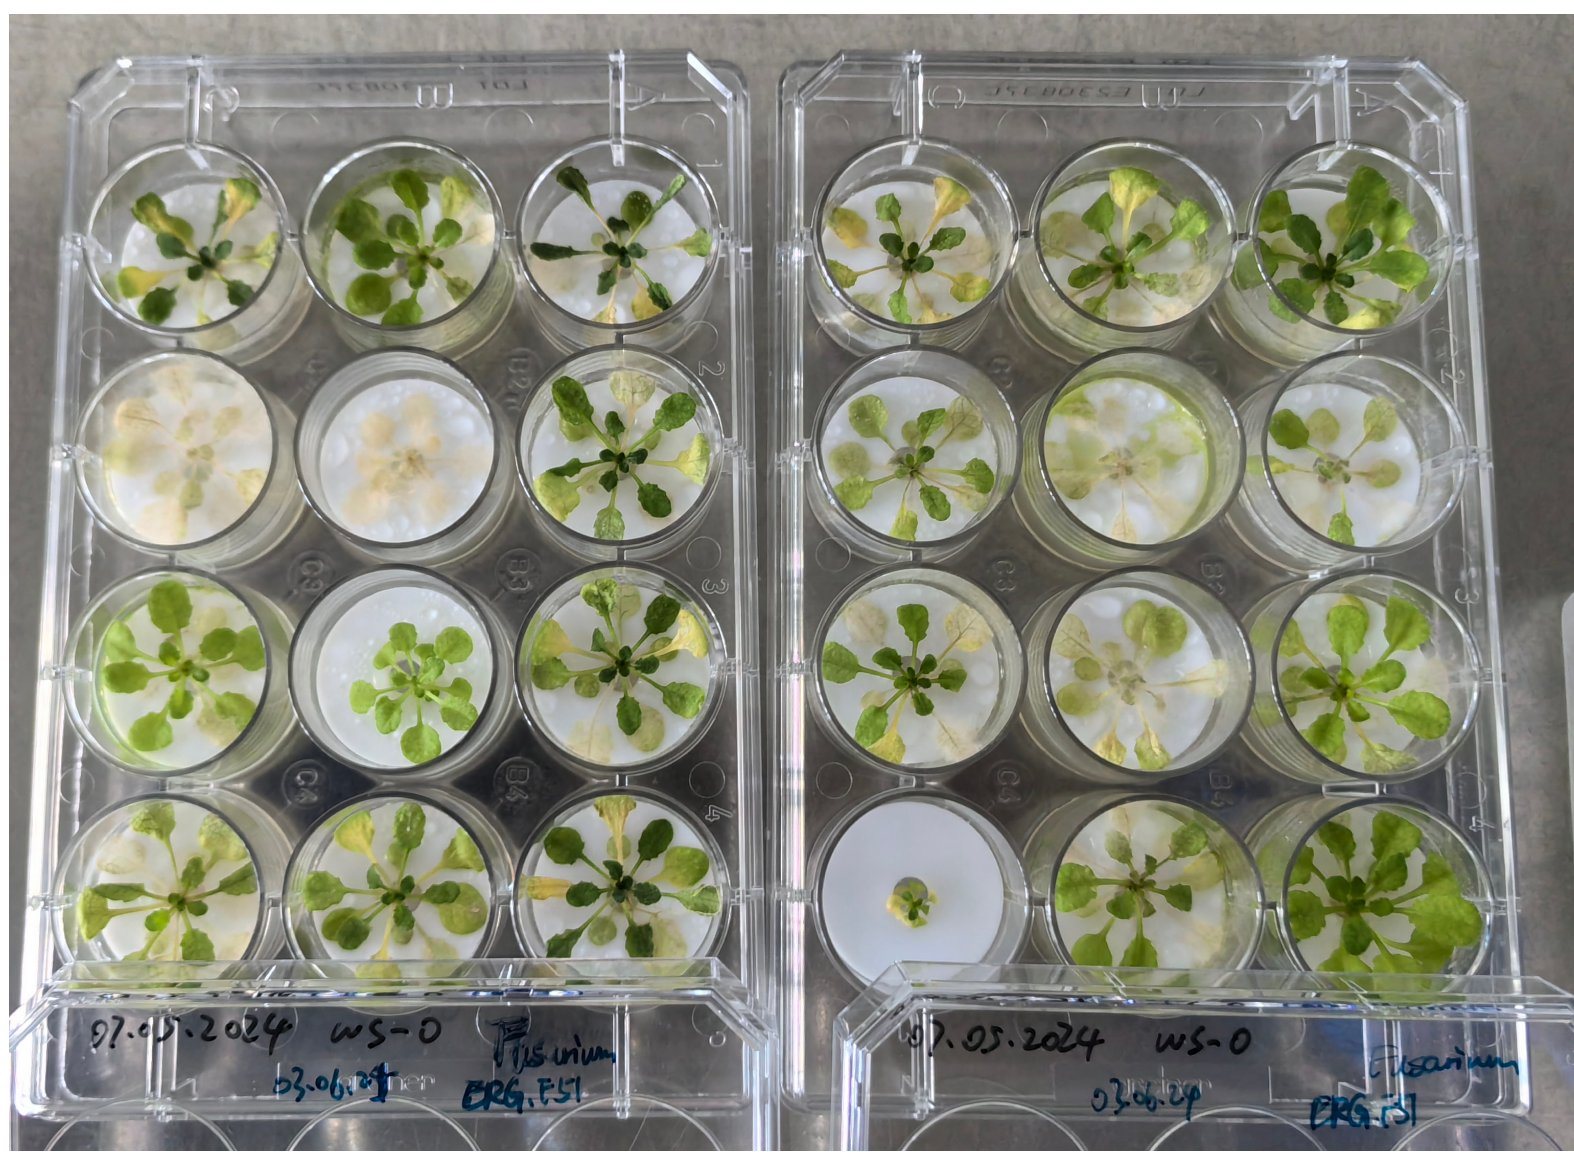

Supplement: Supplementary file 2 [file 2c57e4d58d22401ea5ab6f93.pdf]
